# Supplementary material
Source: HighWire-hosted journal article supplement (https://erj.ersjournals.com/content/55/1/1901072)
Supplement: inline-supplementary-material-1 [file inline-supplementary-material-1.pdf]

**Table 1S:** Gene Ontology (GO) for the differentially expressed miRNAs in exosomes derived from RDBP and NDBP subjects. GO analysis was used to assess (A) cellular components (CC), (B) biological processes (BP), and (C) molecular functions (MF).

| <b>(A) Cellular component</b> |                                                              |          |                 |
|-------------------------------|--------------------------------------------------------------|----------|-----------------|
| <b>Cellular component ID</b>  | <b>Cellular component term</b>                               | <b>%</b> | <b>p- value</b> |
| GO:0043226                    | Organelle                                                    | 71.487   | 8.66E-30        |
| GO:0044464                    | Cell part                                                    | 85.189   | 3.99E-19        |
| GO:0005623                    | Cell                                                         | 85.306   | 4.74E-19        |
| GO:0031974                    | Membrane-enclosed lumen                                      | 25.847   | 8.31E-13        |
| GO:0044422                    | Organelle part                                               | 46.010   | 6.07E-12        |
| GO:0030054                    | Cell junction                                                | 8.836    | 4.22E-10        |
| GO:0045202                    | Synapse                                                      | 4.866    | 3.09E-06        |
| GO:0032991                    | Macromolecular complex                                       | 26.625   | 6.06E-06        |
| GO:0044456                    | Synapse part                                                 | 3.931    | 2.07E-05        |
|                               |                                                              |          |                 |
| <b>(B) Biological process</b> |                                                              |          |                 |
| <b>Biological process</b>     | <b>Biological process term</b>                               | <b>%</b> | <b>p-value</b>  |
| GO:0032502                    | Developmental process                                        | 32.308   | 9.69E-12        |
| GO:0065007                    | Biological regulation                                        | 62.398   | 9.82E-12        |
| GO:0050789                    | Regulation of biological process                             | 59.264   | 1.77E-11        |
| GO:0071840                    | Cellular component organization or biogenesis                | 35.383   | 1.88E-10        |
| GO:0008152                    | Metabolic process                                            | 59.031   | 1.19E-06        |
| GO:0040007                    | Growth                                                       | 5.995    | 1.66E-06        |
| GO:0051179                    | Localization                                                 | 32.036   | 6.75E-05        |
| GO:0022610                    | Biological adhesion                                          | 10.023   | 7.38E-05        |
| GO:0009987                    | Cellular process                                             | 80.498   | 1.07E-04        |
| GO:0040011                    | Locomotion                                                   | 8.914    | 4.55E-04        |
| GO:0048511                    | Rhythmic process                                             | 2.083    | 0.001334        |
|                               |                                                              |          |                 |
| <b>(C) Molecular function</b> |                                                              |          |                 |
| <b>Molecular function ID</b>  | <b>Molecular function term</b>                               | <b>%</b> | <b>p-value</b>  |
| GO:0005515                    | protein binding                                              | 59.848   | 1.36E-16        |
| GO:0043167                    | ion binding                                                  | 26.158   | 1.17E-13        |
| GO:1901363                    | heterocyclic compound binding                                | 34.566   | 2.02E-13        |
| GO:0003700                    | transcription factor activity, sequence-specific DNA binding | 8.447    | 9.27E-13        |
| GO:0097159                    | organic cyclic compound binding                              | 34.819   | 2.02E-12        |
| GO:0000989                    | transcription factor activity, transcription factor binding  | 4.185    | 4.83E-07        |
| GO:004487                     | macromolecular complex binding                               | 8.097    | 3.35E-06        |
| GO:0016740                    | transferase activity                                         | 14.247   | 2.09E-05        |

|            |                                        |        |          |
|------------|----------------------------------------|--------|----------|
| GO:0036094 | small molecule binding                 | 14.578 | 4.07E-04 |
| GO:0097367 | carbohydrate derivative binding        | 12.690 | 0.001197 |
| GO:0005057 | receptor signaling protein activity    | 1.090  | 0.002084 |
| GO:0060090 | binding, bridging                      | 1.226  | 0.008638 |
| GO:0016874 | ligase activity                        | 2.530  | 0.01051  |
| GO:0030371 | translation repressor activity         | 0.214  | 0.029598 |
| GO:0032947 | protein complex scaffold               | 0.506  | 0.032073 |
| GO:0005487 | nucleocytoplasmic transporter activity | 0.272  | 0.032882 |
| GO:0016247 | channel regulator activity             | 0.895  | 0.043023 |
